# Supplementary material for: Semiospheric translation types reconsidered from the translation semiotics perspective
Source: publisher site journal article supplement (doi:10.1515/sem-2017-0151), 2019-10-04
Supplement: Supplementary file 1 [file Title Page-JIA-Supp file.docx]

**Title Page**

**Title: Semiospheric Translation Types Reconsidered from the Translation Semiotics Perspective**

**Author:** Jia Hongwei

**Affiliations:** Department of College English, Capital Normal University, Beijing, China

**Email:** yywhyj@163.com

Mobile: (+86)18600941401

**Postal Address:**

Jia Hongwei

Department of College English,

Capital Normal University

No. 105，Third Ring Road North,

Haidian District

Beijing City

P. R. China, 100048

**Abstract:** Due to the logical problems of unclear boundaries, staggered parallels, disordered standard, etc. existing in Jakobson’s intralingual, interlingual and intersemiotic translations, the first triadic division of translation in terms of semiotics has been criticized since 1980s. However, most of the previous semiotic researches in China and the world at large still stay on the interlingual translation (in the narrow sense) of literary texts, neglecting the semiotic transformations as a sign activity and semiosis between tangible signs and intangible ones in the same and/or different period(s) of time, within the same ethnic culture or across the distinctive ethnic cultures. Hereby, it is necessary to refer to and redefine the term “semiosphere” introduced by Yuri Lotman in 1984 and the literatures after, to revise the intrasemiospheric translation, intersemiospheric translation and suprasemiospheric translation introduced in Jia (2016b & 2017), and to elaborate their nature, structure, content, and connotative significance, not only conducive to building translation semiotics as a subfield of general semiotics, broadening the theoretical visions of applied semiotics and translation studies, and verifying the theoretical validity of general semiotics and translation semiotics in interpreting and explaining the semiotic transformations in translation as a special sign activity.

**Key words:** intrasemiospheric translation; intersemiospheric translation; suprasemiospheric translation; problems and analysis
